# Supplementary material for: Pleural ultrasonography versus chest radiography for the diagnosis of pneumothorax: review of the literature and meta-analysis
Source: PubMed Central journal article supplement (PMC4057340; doi:10.1186/cc13016), 2013-09-23
Supplement: cc13016-S1.pdf [file cc13016-S1.pdf]

**Additional file-1:** Contains details of the excluded studies, statistical tables for main analysis and subgroup analyses.

eTable-1: list of excluded studies

| Study                                                                                                                                                                                                                                                                                      | Comment                                                                                                                                                                                                      |
|--------------------------------------------------------------------------------------------------------------------------------------------------------------------------------------------------------------------------------------------------------------------------------------------|--------------------------------------------------------------------------------------------------------------------------------------------------------------------------------------------------------------|
| 1: Jalli R, Sefidbakht S, Jafari SH. Value of ultrasound in diagnosis of pneumothorax: a prospective study. <i>Emerg Radiol.</i> 2013 Apr;20(2):131-4.                                                                                                                                     | <ul style="list-style-type: none"> <li>- Unacceptably long time between index test and reference standard (up to 48h).</li> <li>- High risk of bias</li> <li>- Insufficient details of index test</li> </ul> |
| 2: Mennicke M, Gulati K, Oliva I, Goldflam K, Skali H, Ledbetter S, Platz E. Anatomical distribution of traumatic pneumothoraces on chest computed tomography: implications for ultrasound screening in the ED. <i>Am J Emerg Med.</i> 2012 Sep;30(7):1025-31                              | <ul style="list-style-type: none"> <li>- No US arm</li> </ul>                                                                                                                                                |
| 3: Zanobetti M, Poggioni C, Pini R. Can chest ultrasonography replace standard chest radiography for evaluation of acute dyspnea in the ED? <i>Chest.</i> 2011 May;139(5):1140-7.                                                                                                          | <ul style="list-style-type: none"> <li>- High risk of bias</li> <li>- Differential verification</li> <li>- Reference standard was not independent of the index test.</li> </ul>                              |
| 4: Vezzani A, Brusasco C, Palermo S, Launo C, Mergoni M, Corradi F. Ultrasound localization of central vein catheter and detection of postprocedural pneumothorax: an alternative to chest radiography. <i>Crit Care Med.</i> 2010 Feb;38(2):533-8.                                        | <ul style="list-style-type: none"> <li>- No CT scan, CXR was considered a reference standard</li> <li>- Few pneumothorax patients</li> </ul>                                                                 |
| 5: Galbois A, Ait-Oufella H, Baudel JL, Kofman T, Bottero J, Viennot S, Rabate C, Jabbouri S, Bouzeman A, Guidet B, Offenstadt G, Maury E. Pleural ultrasound compared with chest radiographic detection of pneumothorax resolution after drainage. <i>Chest.</i> 2010 Sep; 138(3):648-55. | <ul style="list-style-type: none"> <li>- Evaluated patients with known pneumothorax</li> <li>- Differential verification</li> <li>- Possible blinding and methodological issues</li> </ul>                   |
| 6: Sartori S, Tombesi P, Trevisani L, Nielsen I, Tassinari D, Abbasciano V. Accuracy of transthoracic sonography in detection of pneumothorax after sonographically guided lung biopsy: prospective comparison with chest radiography. <i>AJR Am J Roentgenol.</i> 2007 Jan;188(1):37-41.  | <ul style="list-style-type: none"> <li>- Differential verification</li> <li>- Blinding issues</li> </ul>                                                                                                     |
| 7: Garofalo G, Busso M, Perotto F, De Pascale A, Fava C. Ultrasound diagnosis of pneumothorax. <i>Radiol Med.</i> 2006 Jun;111(4):516-25. Epub 2006 May 29.                                                                                                                                | <ul style="list-style-type: none"> <li>- Insufficient CXR data</li> <li>- Unclear if all patients received CXR or not.</li> <li>- Possible selection bias</li> </ul>                                         |
| 8: Blaivas M, Lyon M, Duggal S. A prospective comparison of supine chest radiography and bedside ultrasound for the diagnosis of traumatic pneumothorax. <i>Acad Emerg Med.</i> 2005; 12(9): 844 - 849.                                                                                    | <ul style="list-style-type: none"> <li>- Possible blinding issues</li> <li>- See text</li> </ul>                                                                                                             |
| 9: Reissig A, Kroegel C. [Sonographic diagnosis of post-interventional pneumothorax and hydropneumothorax--prospective study of 100 patients]. <i>Praxis (Bern 1994).</i> 2006 Apr 19;95(16):617-24.                                                                                       | <ul style="list-style-type: none"> <li>- Differential verification</li> <li>- Partial verification</li> <li>- Reference standard was not independent of the index test.</li> </ul>                           |
| 10: Lichtenstein D, Mezière G, Biderman P, Gepner A. The "lung point": an ultrasound sign specific to pneumothorax. <i>Intensive Care Med.</i> 2000 Oct;26(10):1434-40.                                                                                                                    | <ul style="list-style-type: none"> <li>- Partial verification</li> <li>- Possible blinding issues</li> <li>- Patients with known pneumothorax</li> </ul>                                                     |
| 11: Lichtenstein D, Mezière G, Biderman P, Gepner A. The comet-tail artifact: an ultrasound sign ruling out pneumothorax. <i>Intensive Care Med.</i> 1999 Apr;25(4):383-8.                                                                                                                 | <ul style="list-style-type: none"> <li>- Partial verification</li> <li>- Possible blinding issues</li> <li>- Patients with known pneumothorax</li> </ul>                                                     |
| 12: Lichtenstein DA, Menu Y. A bedside ultrasound sign ruling out pneumothorax in the critically ill. Lung sliding. <i>Chest.</i> 1995 Nov;108(5):1345-8.                                                                                                                                  | <ul style="list-style-type: none"> <li>- Partial verification</li> <li>- Possible blinding issues</li> <li>- Patients with known pneumothorax</li> </ul>                                                     |

eTable-2

**CXR - Meta-Regression (Inverse Variance weights)**

| Variable                           | Coeff. | Std. Err. | p - value | RDOR  | [95%CI]       |
|------------------------------------|--------|-----------|-----------|-------|---------------|
| <b>Traum/Non-trauma</b>            | 3.311  | 0.7217    | 0.0013    | 27.42 | (5.36-140.31) |
| <b>Consecutive/non-consecutive</b> | 1.912  | 0.6572    | 0.0173    | 6.77  | (1.53-29.93)  |

Tau-squared estimate = 0.0000 (Convergence is achieved after 1 iterations)

Maximum Likelihood estimation (ML).

No. studies = 13

RDOR= Relative Diagnostic Odds Ratio

eTable-3

**US-Meta-Regression (Inverse Variance weights)**

| Variable                               | Coeff. | Std. Err. | p - value | RDOR  | [95%CI]       |
|----------------------------------------|--------|-----------|-----------|-------|---------------|
| <b>Operator ER physician vs others</b> | -1.296 | 1.1082    | 0.2950    | 0.27  | (0.02-4.73)   |
| <b>Operator Radiologist vs others</b>  | -2.719 | 1.0912    | 0.0551    | 0.07  | (0.00-1.09)   |
| <b>Trauma patients vs non-trauma</b>   | 3.493  | 1.0154    | 0.0184    | 32.87 | (2.42-447.03) |
| <b>Consecutive vs Non-consecutive</b>  | 3.091  | 0.9376    | 0.0216    | 21.99 | (1.98-244.93) |
| <b>Linear array probe vs convex</b>    | 0.799  | 0.8418    | 0.3861    | 2.22  | (0.26-19.35)  |
| <b>Lung point evaluated or not</b>     | 0.119  | 1.0555    | 0.9145    | 1.13  | (0.07-16.99)  |

Tau-squared estimate = 0.2671 (Convergence is achieved after 15 iterations)

Maximum Likelihood estimation (ML).

No. studies = 13

RDOR= Relative Diagnostic Odds Ratio

## Sensitivity and specificity of all CXR studies

### Summary Sensitivity

| Study             | Sen          | [95% Conf. Interval.] | TP/(TP+FN) | TN/(TN+FP) |
|-------------------|--------------|-----------------------|------------|------------|
| Donmez 2012       | 0.686        | 0.507 - 0.831         | 24/35      | 96/101     |
| Abbasi 2012       | 0.486        | 0.369 - 0.606         | 36/74      | 218/218    |
| Hyacithe 2012     | 0.189        | 0.119 - 0.276         | 20/106     | 132/132    |
| Nandipati 2011    | 0.789        | 0.627 - 0.904         | 30/38      | 368/370    |
| Nagarsheth 2011   | 0.318        | 0.186 - 0.476         | 14/44      | 114/114    |
| Xirouchaki 2011   | 0.000        | 0.000 - 0.369         | 0/8        | 75/76      |
| Brook 2009        | 0.163        | 0.068 - 0.307         | 7/43       | 295/295    |
| Soldati 2008      | 0.520        | 0.313 - 0.722         | 13/25      | 193/193    |
| Soldati 2006      | 0.536        | 0.439 - 0.630         | 60/112     | 260/260    |
| Zhang 2006        | 0.276        | 0.167 - 0.409         | 16/58      | 212/212    |
| Chung 2005        | 0.471        | 0.351 - 0.594         | 33/70      | 116.5/124  |
| Kirkpatrick 2004  | 0.209        | 0.100 - 0.360         | 9/43       | 222/223    |
| Rowan 2002        | 0.364        | 0.172 - 0.593         | 8/22       | 32/32      |
| <b>Pooled Sen</b> | <b>0.398</b> | <b>0.294 - 0.503</b>  |            |            |

Heterogeneity chi-squared = 103.07 (d.f.= 12) p = 0.000  
 Inconsistency (I-square) = 88.4 %  
 No. studies = 13.  
 Pooled Confidence Interval corrected for overdispersion

### Summary Specificity

| Study             | Spe          | [95% Conf. Interval.] | TP/(TP+FN) | TN/(TN+FP) |
|-------------------|--------------|-----------------------|------------|------------|
| Donmez 2012       | 0.950        | 0.888 - 0.984         | 24/35      | 96/101     |
| Abbasi 2012       | 1.000        | 0.983 - 1.000         | 36/74      | 218/218    |
| Hyacithe 2012     | 1.000        | 0.972 - 1.000         | 20/106     | 132/132    |
| Nandipati 2011    | 0.995        | 0.981 - 0.999         | 30/38      | 368/370    |
| Nagarsheth 2011   | 1.000        | 0.968 - 1.000         | 14/44      | 114/114    |
| Xirouchaki 2011   | 0.987        | 0.929 - 1.000         | 0/8        | 75/76      |
| Brook 2009        | 1.000        | 0.988 - 1.000         | 7/43       | 295/295    |
| Soldati 2008      | 1.000        | 0.981 - 1.000         | 13/25      | 193/193    |
| Soldati 2006      | 1.000        | 0.986 - 1.000         | 60/112     | 260/260    |
| Zhang 2006        | 1.000        | 0.983 - 1.000         | 16/58      | 212/212    |
| Chung 2005        | 0.940        | 0.882 - 0.974         | 33/70      | 116.5/124  |
| Kirkpatrick 2004  | 0.996        | 0.975 - 1.000         | 9/43       | 222/223    |
| Rowan 2002        | 1.000        | 0.891 - 1.000         | 8/22       | 32/32      |
| <b>Pooled Spe</b> | <b>0.993</b> | <b>0.984 - 1.000</b>  |            |            |

Heterogeneity chi-squared = 51.77 (d.f.= 12) p = 0.000  
 Inconsistency (I-square) = 76.8 %  
 No. studies = 13.  
 Pooled Confidence Interval corrected for overdispersion

## Sensitivity and specificity of all US studies

### Summary Sensitivity

| Study             | Sen          | [95% Conf. Interval.] |                | TP/(TP+FN) | TN/(TN+FP) |
|-------------------|--------------|-----------------------|----------------|------------|------------|
| Donmez 2012       | 0.914        | 0.769                 | - 0.982        | 32/35      | 98/101     |
| Abbasi 2012       | 0.865        | 0.765                 | - 0.933        | 64/74      | 218/218    |
| Hyacithe 2012     | 0.528        | 0.429                 | - 0.626        | 56/106     | 126/132    |
| Nandipati 2011    | 0.952        | 0.838                 | - 0.994        | 40/42      | 364/366    |
| Nagarsheth 2011   | 0.818        | 0.673                 | - 0.918        | 36/44      | 114/114    |
| Xirouchaki 2011   | 0.750        | 0.349                 | - 0.968        | 6/8        | 71/76      |
| Brook 2009        | 0.465        | 0.312                 | - 0.623        | 20/43      | 292/295    |
| Soldati 2008      | 0.920        | 0.740                 | - 0.990        | 23/25      | 192/193    |
| Soldati 2006      | 0.982        | 0.937                 | - 0.998        | 110/112    | 260/260    |
| Zhang 2006        | 0.862        | 0.746                 | - 0.939        | 50/58      | 206/212    |
| Chung 2005        | 0.800        | 0.687                 | - 0.886        | 56/70      | 116.5/124  |
| Kirkpatrick 2004  | 0.488        | 0.333                 | - 0.645        | 21/43      | 220/223    |
| Rowan 2002        | 1.000        | 0.846                 | - 1.000        | 22/22      | 30/32      |
| <b>Pooled Sen</b> | <b>0.786</b> | <b>0.681</b>          | <b>- 0.891</b> |            |            |

Heterogeneity chi-squared = 146.25 (d.f.= 12) p = 0.000  
 Inconsistency (I-square) = 91.8 %  
 No. studies = 13.  
 Pooled Confidence Interval corrected for overdispersion

### Summary Specificity

| Study             | Spe          | [95% Conf. Interval.] |                | TP/(TP+FN) | TN/(TN+FP) |
|-------------------|--------------|-----------------------|----------------|------------|------------|
| Donmez 2012       | 0.970        | 0.916                 | - 0.994        | 32/35      | 98/101     |
| Abbasi 2012       | 1.000        | 0.983                 | - 1.000        | 64/74      | 218/218    |
| Hyacithe 2012     | 0.955        | 0.904                 | - 0.983        | 56/106     | 126/132    |
| Nandipati 2011    | 0.995        | 0.980                 | - 0.999        | 40/42      | 364/366    |
| Nagarsheth 2011   | 1.000        | 0.968                 | - 1.000        | 36/44      | 114/114    |
| Xirouchaki 2011   | 0.934        | 0.853                 | - 0.978        | 6/8        | 71/76      |
| Brook 2009        | 0.990        | 0.971                 | - 0.998        | 20/43      | 292/295    |
| Soldati 2008      | 0.995        | 0.971                 | - 1.000        | 23/25      | 192/193    |
| Soldati 2006      | 1.000        | 0.986                 | - 1.000        | 110/112    | 260/260    |
| Zhang 2006        | 0.972        | 0.939                 | - 0.990        | 50/58      | 206/212    |
| Chung 2005        | 0.940        | 0.882                 | - 0.974        | 56/70      | 116.5/124  |
| Kirkpatrick 2004  | 0.987        | 0.961                 | - 0.997        | 21/43      | 220/223    |
| Rowan 2002        | 0.938        | 0.792                 | - 0.992        | 22/22      | 30/32      |
| <b>Pooled Spe</b> | <b>0.984</b> | <b>0.973</b>          | <b>- 0.995</b> |            |            |

Heterogeneity chi-squared = 51.27 (d.f.= 12) p = 0.000  
 Inconsistency (I-square) = 76.6 %  
 No. studies = 13.  
 Pooled Confidence Interval corrected for overdispersion

## Sensitivity and specificity of consecutive sampling CXR studies

### Summary Sensitivity

| Study             | Sen          | [95% Conf. Interval.] | TP/(TP+FN) | TN/(TN+FP) |
|-------------------|--------------|-----------------------|------------|------------|
| Nandipati 2011    | 0.789        | 0.627 - 0.904         | 30/38      | 368/370    |
| Brook 2009        | 0.163        | 0.068 - 0.307         | 7/43       | 295/295    |
| Soldati 2008      | 0.520        | 0.313 - 0.722         | 13/25      | 193/193    |
| Soldati 2006      | 0.536        | 0.439 - 0.630         | 60/112     | 260/260    |
| Chung 2005        | 0.471        | 0.351 - 0.594         | 33/70      | 116.5/124  |
| <b>Pooled Sen</b> | <b>0.497</b> | <b>0.330 - 0.663</b>  |            |            |

Heterogeneity chi-squared = 35.80 (d.f.= 4) p = 0.000  
Inconsistency (I-square) = 88.8 %  
No. studies = 5.  
Pooled Confidence Interval corrected for overdispersion

### Summary Specificity

| Study             | Spe          | [95% Conf. Interval.] | TP/(TP+FN) | TN/(TN+FP) |
|-------------------|--------------|-----------------------|------------|------------|
| Nandipati 2011    | 0.995        | 0.981 - 0.999         | 30/38      | 368/370    |
| Brook 2009        | 1.000        | 0.988 - 1.000         | 7/43       | 295/295    |
| Soldati 2008      | 1.000        | 0.981 - 1.000         | 13/25      | 193/193    |
| Soldati 2006      | 1.000        | 0.986 - 1.000         | 60/112     | 260/260    |
| Chung 2005        | 0.940        | 0.882 - 0.974         | 33/70      | 116.5/124  |
| <b>Pooled Spe</b> | <b>0.992</b> | <b>0.975 - 1.000</b>  |            |            |

Heterogeneity chi-squared = 30.03 (d.f.= 4) p = 0.000  
Inconsistency (I-square) = 86.7 %  
No. studies = 5.  
Pooled Confidence Interval corrected for overdispersion

## Sensitivity and specificity of CXR convenience sampling studies

### Summary Sensitivity

| Study             | Sen          | [95% Conf. Interval.] | TP/(TP+FN) | TN/(TN+FP) |
|-------------------|--------------|-----------------------|------------|------------|
| Donmez 2012       | 0.686        | 0.507 - 0.831         | 24/35      | 96/101     |
| Abbasi 2012       | 0.486        | 0.369 - 0.606         | 36/74      | 218/218    |
| Hyacithe 2012     | 0.189        | 0.119 - 0.276         | 20/106     | 132/132    |
| Nagarsheth 2011   | 0.318        | 0.186 - 0.476         | 14/44      | 114/114    |
| Xirouchaki 2011   | 0.000        | 0.000 - 0.369         | 0/8        | 75/76      |
| Zhang 2006        | 0.276        | 0.167 - 0.409         | 16/58      | 212/212    |
| Kirkpatrick 2004  | 0.209        | 0.100 - 0.360         | 9/43       | 222/223    |
| Rowan 2002        | 0.364        | 0.172 - 0.593         | 8/22       | 32/32      |
| <b>Pooled Sen</b> | <b>0.326</b> | <b>0.207 - 0.445</b>  |            |            |

Heterogeneity chi-squared = 47.11 (d.f.= 7) p = 0.000  
 Inconsistency (I-square) = 85.1 %  
 No. studies =8.  
 Pooled Confidence Interval corrected for overdispersion

### Summary Specificity

| Study             | Spe          | [95% Conf. Interval.] | TP/(TP+FN) | TN/(TN+FP) |
|-------------------|--------------|-----------------------|------------|------------|
| Donmez 2012       | 0.950        | 0.888 - 0.984         | 24/35      | 96/101     |
| Abbasi 2012       | 1.000        | 0.983 - 1.000         | 36/74      | 218/218    |
| Hyacithe 2012     | 1.000        | 0.972 - 1.000         | 20/106     | 132/132    |
| Nagarsheth 2011   | 1.000        | 0.968 - 1.000         | 14/44      | 114/114    |
| Xirouchaki 2011   | 0.987        | 0.929 - 1.000         | 0/8        | 75/76      |
| Zhang 2006        | 1.000        | 0.983 - 1.000         | 16/58      | 212/212    |
| Kirkpatrick 2004  | 0.996        | 0.975 - 1.000         | 9/43       | 222/223    |
| Rowan 2002        | 1.000        | 0.891 - 1.000         | 8/22       | 32/32      |
| <b>Pooled Spe</b> | <b>0.994</b> | <b>0.983 - 1.000</b>  |            |            |

Heterogeneity chi-squared = 21.59 (d.f.= 7) p = 0.003  
 Inconsistency (I-square) = 67.6 %  
 No. studies = 8.  
 Pooled Confidence Interval corrected for overdispersion

## Sensitivity and specificity of non-trauma CXR studies

### Summary Sensitivity

| Study             |          | Sen          | [95% Conf. Interval.] | TP/(TP+FN) | TN/(TN+FP) |
|-------------------|----------|--------------|-----------------------|------------|------------|
| Xirouchaki 2011   |          | 0.000        | 0.000 - 0.369         | 0/8        | 75/76      |
| Chung 2005        |          | 0.471        | 0.351 - 0.594         | 33/70      | 116.5/124  |
| <b>Pooled Sen</b> | <b> </b> | <b>0.423</b> | <b>0.143 - 0.703</b>  |            |            |

Heterogeneity chi-squared = 9.47 (d.f.= 1) p = 0.002  
Inconsistency (I-square) = 89.4 %  
No. studies = 2.  
Pooled Confidence Interval corrected for overdispersion

### Summary Specificity

| Study             |          | Spe          | [95% Conf. Interval.] | TP/(TP+FN) | TN/(TN+FP) |
|-------------------|----------|--------------|-----------------------|------------|------------|
| Xirouchaki 2011   |          | 0.987        | 0.929 - 1.000         | 0/8        | 75/76      |
| Chung 2005        |          | 0.940        | 0.882 - 0.974         | 33/70      | 116.5/124  |
| <b>Pooled Spe</b> | <b> </b> | <b>0.958</b> | <b>0.912 - 1.000</b>  |            |            |

Heterogeneity chi-squared = 3.06 (d.f.= 1) p = 0.080  
Inconsistency (I-square) = 67.3 %  
No. studies = 2.  
Pooled Confidence Interval corrected for overdispersion

## Sensitivity and specificity of US consecutive sampling studies

### Summary Sensitivity

| Study             | Sen          | [95% Conf. Interval.] | TP/(TP+FN) | TN/(TN+FP) |
|-------------------|--------------|-----------------------|------------|------------|
| Nandipati 2011    | 0.952        | 0.838 - 0.994         | 40/42      | 364/366    |
| Brook 2009        | 0.465        | 0.312 - 0.623         | 20/43      | 292/295    |
| Soldati 2008      | 0.920        | 0.740 - 0.990         | 23/25      | 192/193    |
| Soldati 2006      | 0.982        | 0.937 - 0.998         | 110/112    | 260/260    |
| Chung 2005        | 0.800        | 0.687 - 0.886         | 56/70      | 116.5/124  |
| <b>Pooled Sen</b> | <b>0.853</b> | <b>0.680 - 1.000</b>  |            |            |

Heterogeneity chi-squared = 64.53 (d.f.= 4) p = 0.000  
Inconsistency (I-square) = 93.8 %  
No. studies = 5.  
Pooled Confidence Interval corrected for overdispersion

### Summary Specificity

| Study             | Spe          | [95% Conf. Interval.] | TP/(TP+FN) | TN/(TN+FP) |
|-------------------|--------------|-----------------------|------------|------------|
| Nandipati 2011    | 0.995        | 0.980 - 0.999         | 40/42      | 364/366    |
| Brook 2009        | 0.990        | 0.971 - 0.998         | 20/43      | 292/295    |
| Soldati 2008      | 0.995        | 0.971 - 1.000         | 23/25      | 192/193    |
| Soldati 2006      | 1.000        | 0.986 - 1.000         | 110/112    | 260/260    |
| Chung 2005        | 0.940        | 0.882 - 0.974         | 56/70      | 116.5/124  |
| <b>Pooled Spe</b> | <b>0.989</b> | <b>0.973 - 1.000</b>  |            |            |

Heterogeneity chi-squared = 21.39 (d.f.= 4) p = 0.000  
Inconsistency (I-square) = 81.3 %  
No. studies = 5.  
Pooled Confidence Interval corrected for overdispersion



## Sensitivity and specificity of US convenience sampling studies

### Summary Sensitivity

| Study             | Sen          | [95% Conf. Interval.] | TP/(TP+FN) | TN/(TN+FP) |
|-------------------|--------------|-----------------------|------------|------------|
| Donmez 2012       | 0.914        | 0.769 - 0.982         | 32/35      | 98/101     |
| Abbasi 2012       | 0.865        | 0.765 - 0.933         | 64/74      | 218/218    |
| Hyacithe 2012     | 0.528        | 0.429 - 0.626         | 56/106     | 126/132    |
| Nagarsheth 2011   | 0.818        | 0.673 - 0.918         | 36/44      | 114/114    |
| Xirouchaki 2011   | 0.750        | 0.349 - 0.968         | 6/8        | 71/76      |
| Zhang 2006        | 0.862        | 0.746 - 0.939         | 50/58      | 206/212    |
| Kirkpatrick 2004  | 0.488        | 0.333 - 0.645         | 21/43      | 220/223    |
| Rowan 2002        | 1.000        | 0.846 - 1.000         | 22/22      | 30/32      |
| <b>Pooled Sen</b> | <b>0.736</b> | <b>0.604 - 0.867</b>  |            |            |

Heterogeneity chi-squared = 67.76 (d.f.= 7) p = 0.000  
 Inconsistency (I-square) = 89.7 %  
 No. studies = 8.  
 Pooled Confidence Interval corrected for overdispersion

### Summary Specificity

| Study             | Spe          | [95% Conf. Interval.] | TP/(TP+FN) | TN/(TN+FP) |
|-------------------|--------------|-----------------------|------------|------------|
| Donmez 2012       | 0.970        | 0.916 - 0.994         | 32/35      | 98/101     |
| Abbasi 2012       | 1.000        | 0.983 - 1.000         | 64/74      | 218/218    |
| Hyacithe 2012     | 0.955        | 0.904 - 0.983         | 56/106     | 126/132    |
| Nagarsheth 2011   | 1.000        | 0.968 - 1.000         | 36/44      | 114/114    |
| Xirouchaki 2011   | 0.934        | 0.853 - 0.978         | 6/8        | 71/76      |
| Zhang 2006        | 0.972        | 0.939 - 0.990         | 50/58      | 206/212    |
| Kirkpatrick 2004  | 0.987        | 0.961 - 0.997         | 21/43      | 220/223    |
| Rowan 2002        | 0.938        | 0.792 - 0.992         | 22/22      | 30/32      |
| <b>Pooled Spe</b> | <b>0.977</b> | <b>0.962 - 0.993</b>  |            |            |

Heterogeneity chi-squared = 24.92 (d.f.= 7) p = 0.001  
 Inconsistency (I-square) = 71.9 %  
 No. studies = 8.  
 Pooled Confidence Interval corrected for overdispersion

## US studies: Linear array probe sensitivity and specificity

### Summary Sensitivity

| Study             | Sen          | [95% Conf. Interval.] | TP/(TP+FN) | TN/(TN+FP) |
|-------------------|--------------|-----------------------|------------|------------|
| Donmez 2012       | 0.914        | 0.769 - 0.982         | 32/35      | 98/101     |
| Abbasi 2012       | 0.865        | 0.765 - 0.933         | 64/74      | 218/218    |
| Nandipati 2011    | 0.952        | 0.838 - 0.994         | 40/42      | 364/366    |
| Chung 2005        | 0.800        | 0.687 - 0.886         | 56/70      | 116.5/124  |
| Kirkpatrick 2004  | 0.488        | 0.333 - 0.645         | 21/43      | 220/223    |
| Rowan 2002        | 1.000        | 0.846 - 1.000         | 22/22      | 30/32      |
| <b>Pooled Sen</b> | <b>0.822</b> | <b>0.688 - 0.955</b>  |            |            |

Heterogeneity chi-squared = 43.36 (d.f.= 5) p = 0.000  
Inconsistency (I-square) = 88.5 %  
No. studies = 6.  
Pooled Confidence Interval corrected for overdispersion

### Summary Specificity

| Study             | Spe          | [95% Conf. Interval.] | TP/(TP+FN) | TN/(TN+FP) |
|-------------------|--------------|-----------------------|------------|------------|
| Donmez 2012       | 0.970        | 0.916 - 0.994         | 32/35      | 98/101     |
| Abbasi 2012       | 1.000        | 0.983 - 1.000         | 64/74      | 218/218    |
| Nandipati 2011    | 0.995        | 0.980 - 0.999         | 40/42      | 364/366    |
| Chung 2005        | 0.940        | 0.882 - 0.974         | 56/70      | 116.5/124  |
| Kirkpatrick 2004  | 0.987        | 0.961 - 0.997         | 21/43      | 220/223    |
| Rowan 2002        | 0.938        | 0.792 - 0.992         | 22/22      | 30/32      |
| <b>Pooled Spe</b> | <b>0.984</b> | <b>0.966 - 1.000</b>  |            |            |

Heterogeneity chi-squared = 23.25 (d.f.= 5) p = 0.000  
Inconsistency (I-square) = 78.5 %  
No. studies = 6.  
Pooled Confidence Interval corrected for overdispersion

## US studies: Convex array probe sensitivity and specificity

### Summary Sensitivity

| Study             | Sen          | [95% Conf. Interval.] | TP/(TP+FN) | TN/(TN+FP) |
|-------------------|--------------|-----------------------|------------|------------|
| Hyacithe 2012     | 0.528        | 0.429 - 0.626         | 56/106     | 126/132    |
| Nagarsheth 2011   | 0.818        | 0.673 - 0.918         | 36/44      | 114/114    |
| Xirouchaki 2011   | 0.750        | 0.349 - 0.968         | 6/8        | 71/76      |
| Brook 2009        | 0.465        | 0.312 - 0.623         | 20/43      | 292/295    |
| Soldati 2008      | 0.920        | 0.740 - 0.990         | 23/25      | 192/193    |
| Soldati 2006      | 0.982        | 0.937 - 0.998         | 110/112    | 260/260    |
| Zhang 2006        | 0.862        | 0.746 - 0.939         | 50/58      | 206/212    |
| <b>Pooled Sen</b> | <b>0.760</b> | <b>0.598 - 0.923</b>  |            |            |

Heterogeneity chi-squared = 99.09 (d.f.= 6) p = 0.000  
 Inconsistency (I-square) = 93.9 %  
 No. studies = 7.  
 Pooled Confidence Interval corrected for overdispersion

### Summary Specificity

| Study             | Spe          | [95% Conf. Interval.] | TP/(TP+FN) | TN/(TN+FP) |
|-------------------|--------------|-----------------------|------------|------------|
| Hyacithe 2012     | 0.955        | 0.904 - 0.983         | 56/106     | 126/132    |
| Nagarsheth 2011   | 1.000        | 0.968 - 1.000         | 36/44      | 114/114    |
| Xirouchaki 2011   | 0.934        | 0.853 - 0.978         | 6/8        | 71/76      |
| Brook 2009        | 0.990        | 0.971 - 0.998         | 20/43      | 292/295    |
| Soldati 2008      | 0.995        | 0.971 - 1.000         | 23/25      | 192/193    |
| Soldati 2006      | 1.000        | 0.986 - 1.000         | 110/112    | 260/260    |
| Zhang 2006        | 0.972        | 0.939 - 0.990         | 50/58      | 206/212    |
| <b>Pooled Spe</b> | <b>0.984</b> | <b>0.968 - 0.999</b>  |            |            |

Heterogeneity chi-squared = 28.03 (d.f.= 6) p = 0.000  
 Inconsistency (I-square) = 78.6 %  
 No. studies = 7.  
 Pooled Confidence Interval corrected for overdispersion

## Emergency physician-performed US: sensitivity and specificity

### Summary Sensitivity

| Study             |          | Sen          | [95% Conf. Interval.] | TP/(TP+FN) | TN/(TN+FP) |
|-------------------|----------|--------------|-----------------------|------------|------------|
| Abbasi 2012       |          | 0.865        | 0.765 - 0.933         | 64/74      | 218/218    |
| Hyacithe 2012     |          | 0.528        | 0.429 - 0.626         | 56/106     | 126/132    |
| Nandipati 2011    |          | 0.952        | 0.838 - 0.994         | 40/42      | 364/366    |
| Soldati 2008      |          | 0.920        | 0.740 - 0.990         | 23/25      | 192/193    |
| Soldati 2006      |          | 0.982        | 0.937 - 0.998         | 110/112    | 260/260    |
| Zhang 2006        |          | 0.862        | 0.746 - 0.939         | 50/58      | 206/212    |
| <b>Pooled Sen</b> | <b> </b> | <b>0.823</b> | <b>0.667 - 0.978</b>  |            |            |

Heterogeneity chi-squared = 88.07 (d.f.= 5) p = 0.000  
Inconsistency (I-square) = 94.3 %  
No. studies = 6.  
Pooled Confidence Interval corrected for overdispersion

### Summary Specificity

| Study             |          | Spe          | [95% Conf. Interval.] | TP/(TP+FN) | TN/(TN+FP) |
|-------------------|----------|--------------|-----------------------|------------|------------|
| Abbasi 2012       |          | 1.000        | 0.983 - 1.000         | 64/74      | 218/218    |
| Hyacithe 2012     |          | 0.955        | 0.904 - 0.983         | 56/106     | 126/132    |
| Nandipati 2011    |          | 0.995        | 0.980 - 0.999         | 40/42      | 364/366    |
| Soldati 2008      |          | 0.995        | 0.971 - 1.000         | 23/25      | 192/193    |
| Soldati 2006      |          | 1.000        | 0.986 - 1.000         | 110/112    | 260/260    |
| Zhang 2006        |          | 0.972        | 0.939 - 0.990         | 50/58      | 206/212    |
| <b>Pooled Spe</b> | <b> </b> | <b>0.989</b> | <b>0.976 - 1.000</b>  |            |            |

Heterogeneity chi-squared = 24.74 (d.f.= 5) p = 0.000  
Inconsistency (I-square) = 79.8 %  
No. studies = 6.  
Pooled Confidence Interval corrected for overdispersion

## Non-Emergency physician-performed US: sensitivity and specificity

### Summary Sensitivity

| Study             | Sen          | [95% Conf. Interval.] | TP/(TP+FN) | TN/(TN+FP) |
|-------------------|--------------|-----------------------|------------|------------|
| Donmez 2012       | 0.914        | 0.769 - 0.982         | 32/35      | 98/101     |
| Nagarsheth 2011   | 0.818        | 0.673 - 0.918         | 36/44      | 114/114    |
| Xirouchaki 2011   | 0.750        | 0.349 - 0.968         | 6/8        | 71/76      |
| Brook 2009        | 0.465        | 0.312 - 0.623         | 20/43      | 292/295    |
| Chung 2005        | 0.800        | 0.687 - 0.886         | 56/70      | 116.5/124  |
| Kirkpatrick 2004  | 0.488        | 0.333 - 0.645         | 21/43      | 220/223    |
| Rowan 2002        | 1.000        | 0.846 - 1.000         | 22/22      | 30/32      |
| <b>Pooled Sen</b> | <b>0.728</b> | <b>0.581 - 0.876</b>  |            |            |

Heterogeneity chi-squared = 49.78 (d.f.= 6) p = 0.000  
 Inconsistency (I-square) = 87.9 %  
 No. studies = 7.  
 Pooled Confidence Interval corrected for overdispersion

### Summary Specificity

| Study             | Spe          | [95% Conf. Interval.] | TP/(TP+FN) | TN/(TN+FP) |
|-------------------|--------------|-----------------------|------------|------------|
| Donmez 2012       | 0.970        | 0.916 - 0.994         | 32/35      | 98/101     |
| Nagarsheth 2011   | 1.000        | 0.968 - 1.000         | 36/44      | 114/114    |
| Xirouchaki 2011   | 0.934        | 0.853 - 0.978         | 6/8        | 71/76      |
| Brook 2009        | 0.990        | 0.971 - 0.998         | 20/43      | 292/295    |
| Chung 2005        | 0.940        | 0.882 - 0.974         | 56/70      | 116.5/124  |
| Kirkpatrick 2004  | 0.987        | 0.961 - 0.997         | 21/43      | 220/223    |
| Rowan 2002        | 0.938        | 0.792 - 0.992         | 22/22      | 30/32      |
| <b>Pooled Spe</b> | <b>0.976</b> | <b>0.958 - 0.994</b>  |            |            |

Heterogeneity chi-squared = 20.26 (d.f.= 6) p = 0.002  
 Inconsistency (I-square) = 70.4 %  
 No. studies = 7.  
 Pooled Confidence Interval corrected for overdispersion
